# Supplementary material
Source: PubMed Central journal article supplement (PMC9054905)

# Supplementary Figure 1

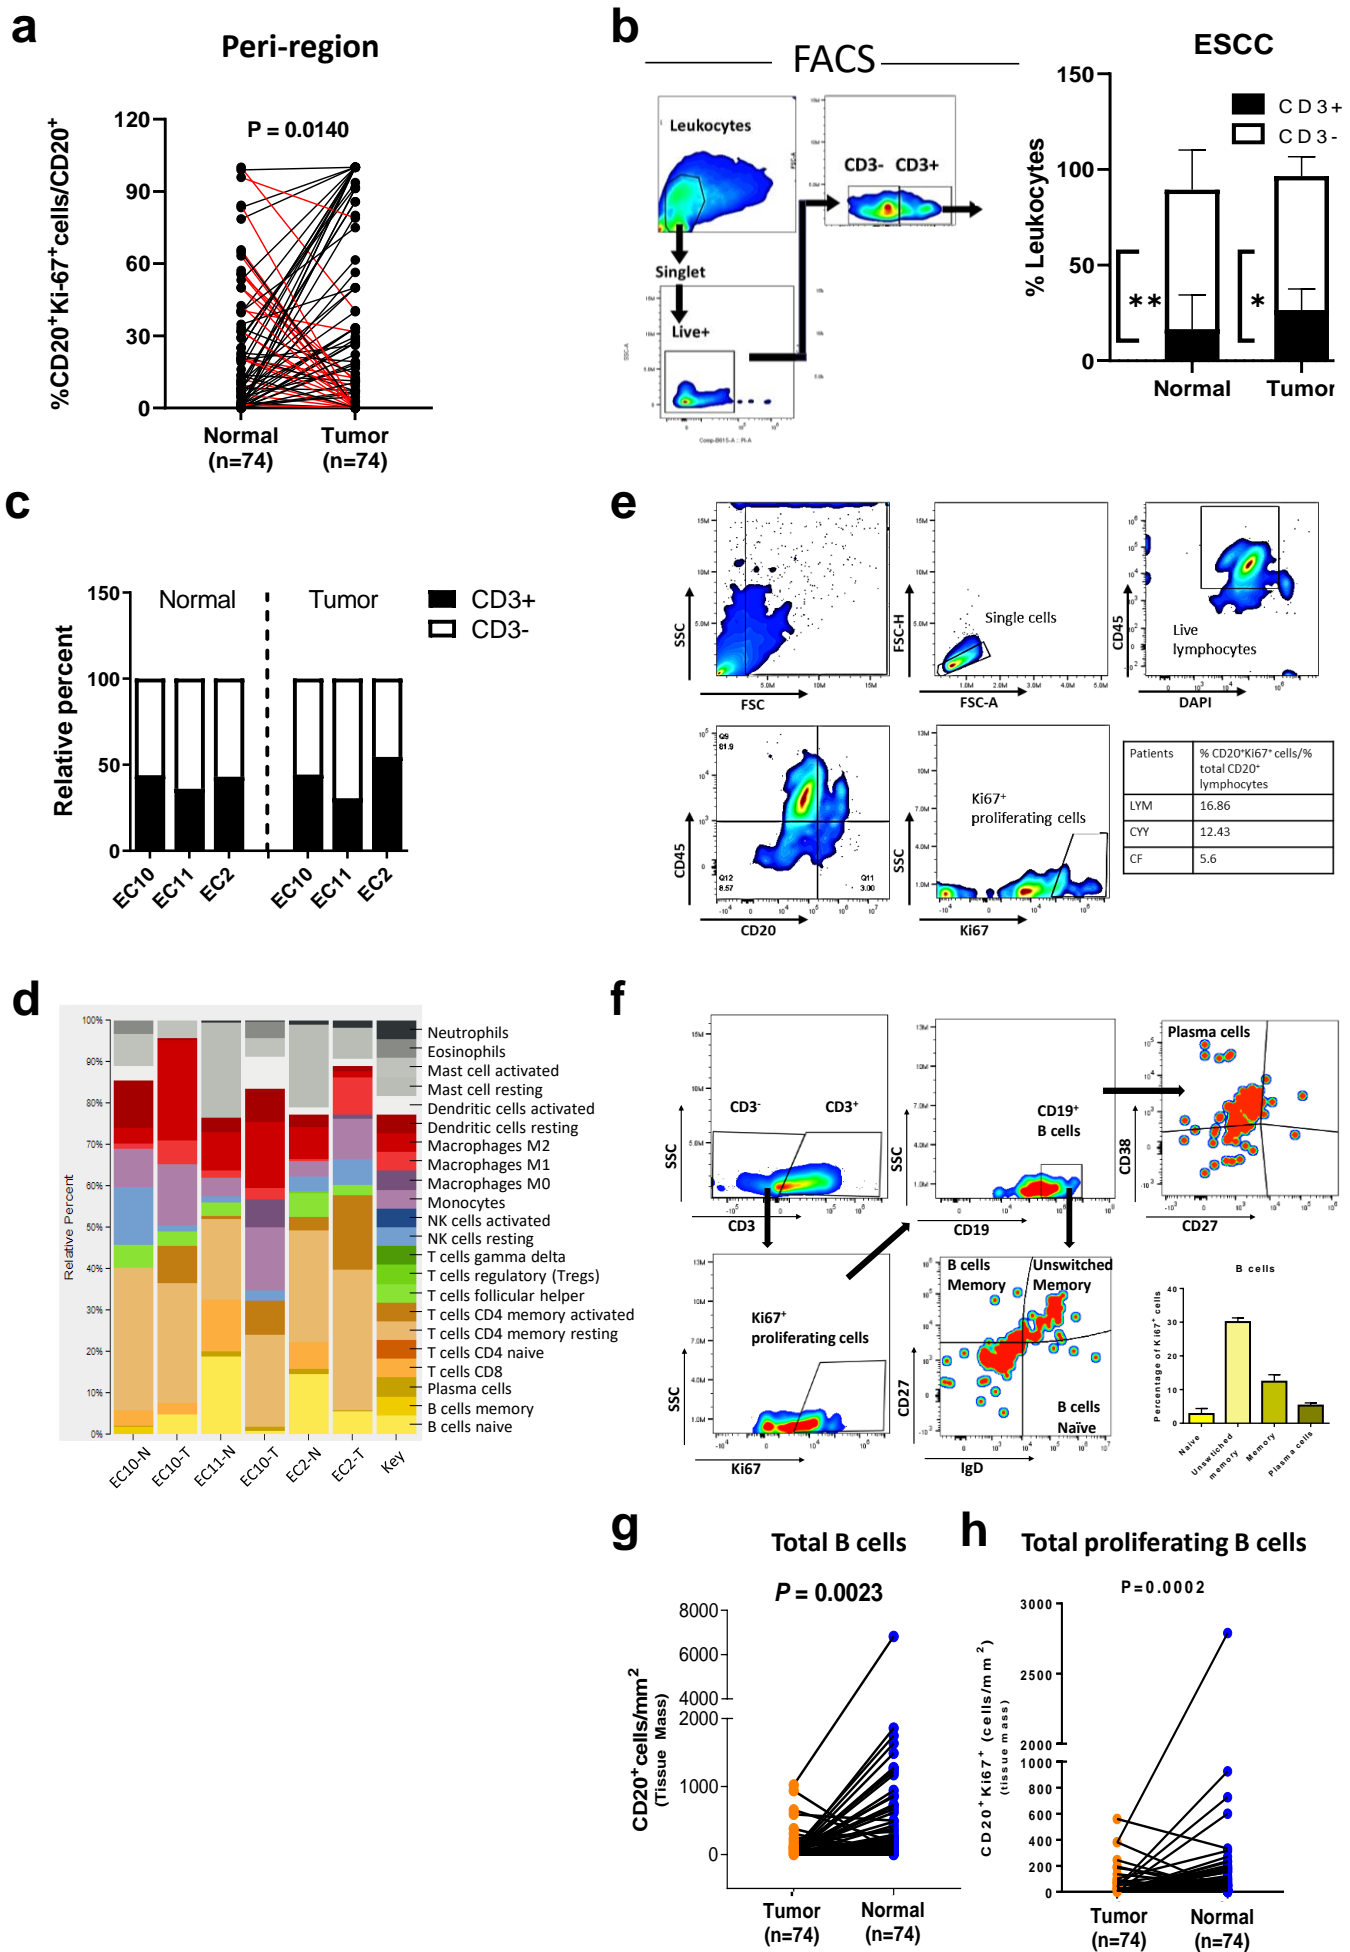

# Supplementary Figure 2

**a**

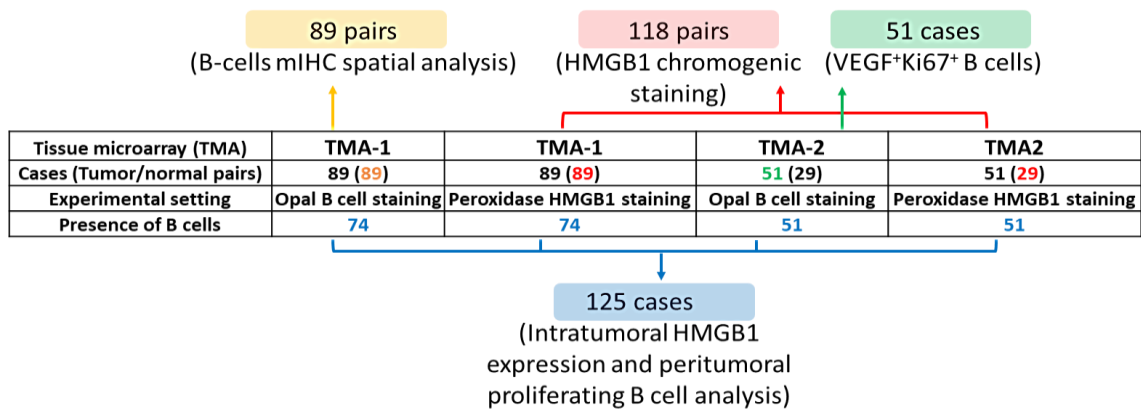

**b**

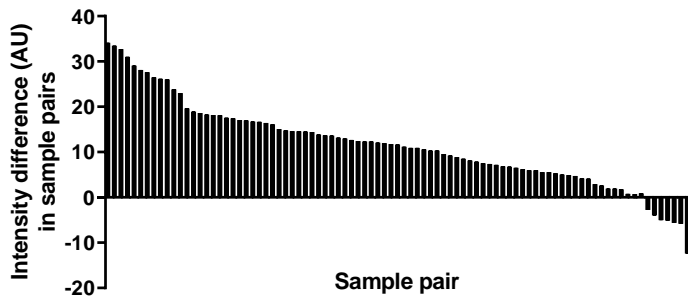

**c**

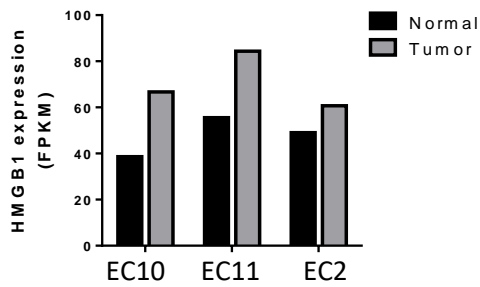

**d**

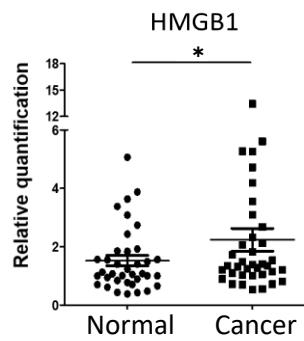

**e**

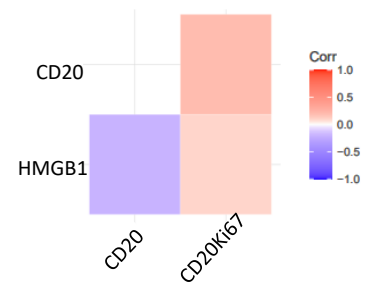

# Supplementary Figure 3

**a**

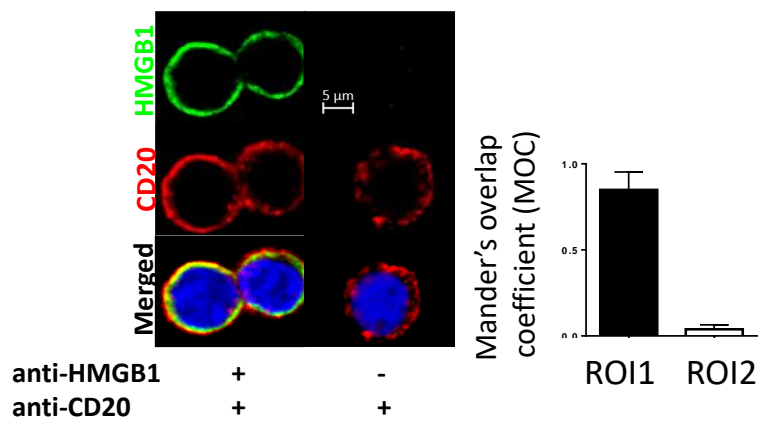

**b**

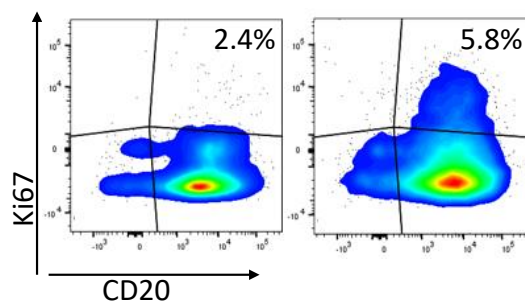

**c**

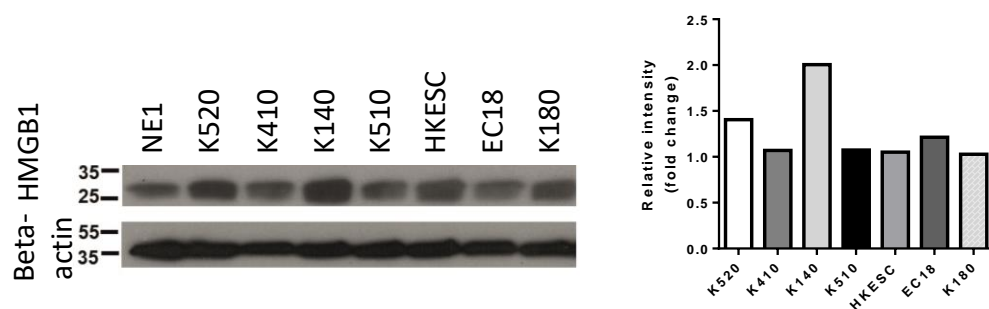

**d**

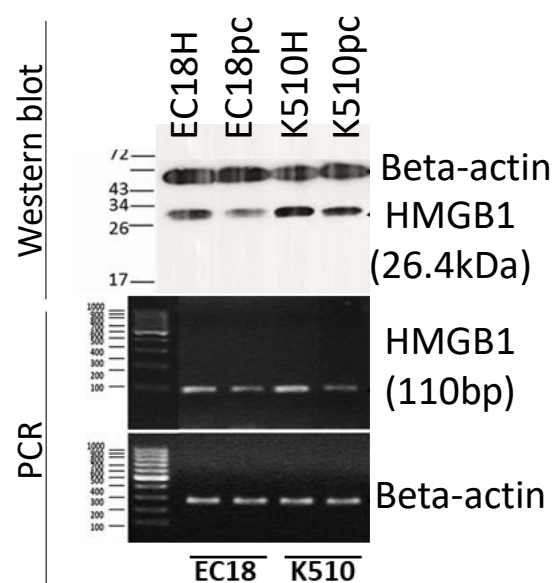

**e**

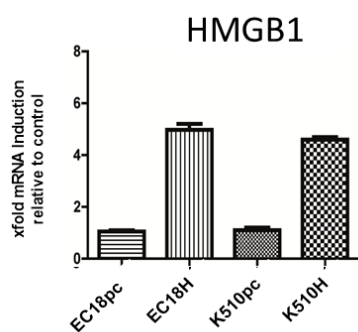

**f**

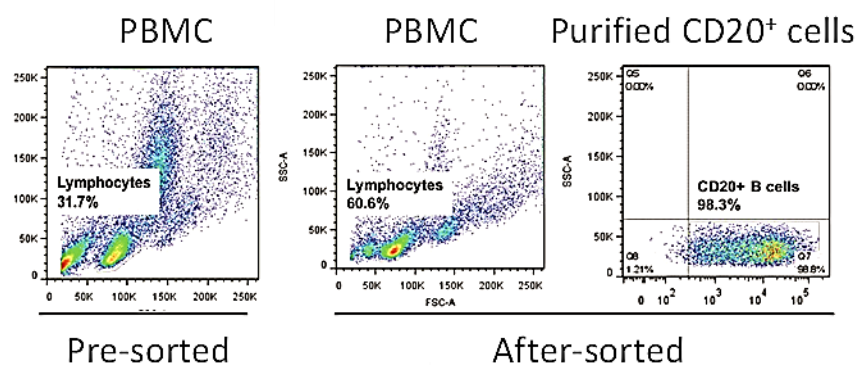

# Supplementary Figure 4

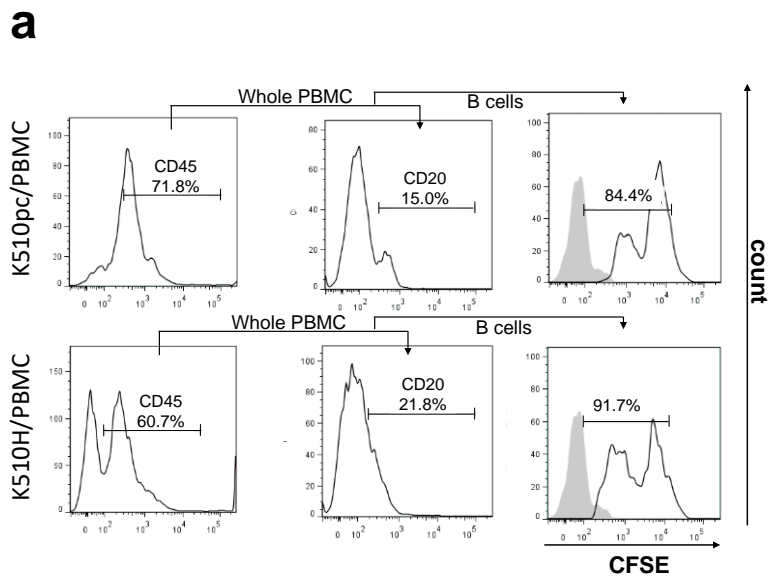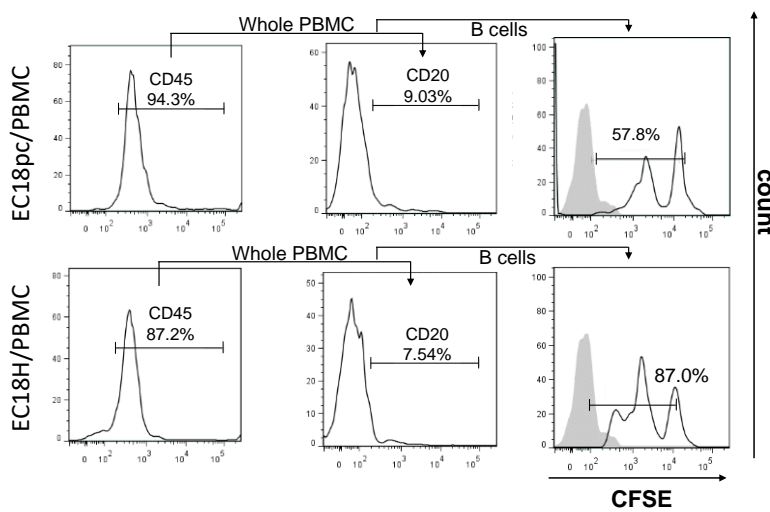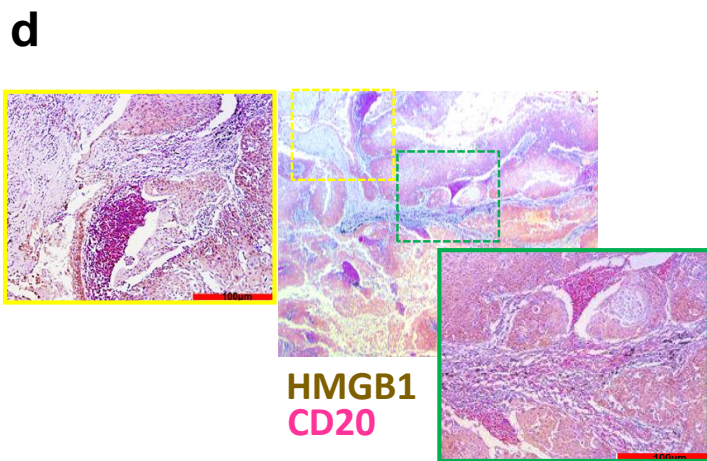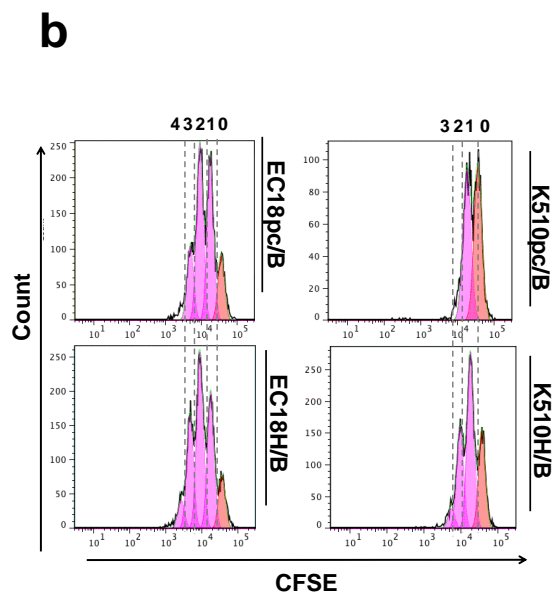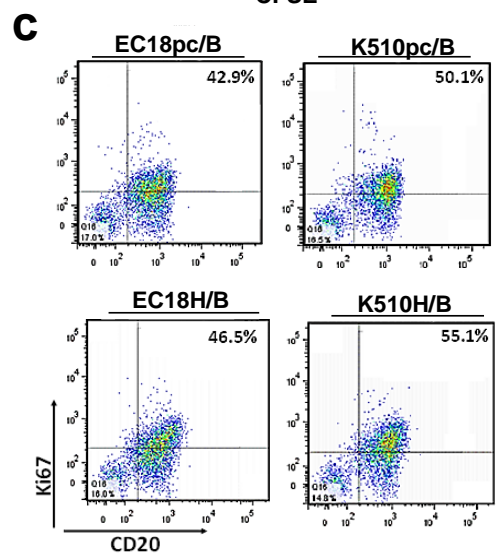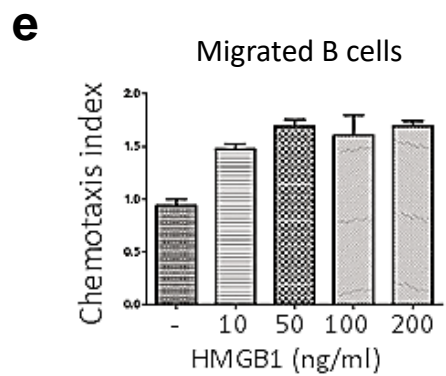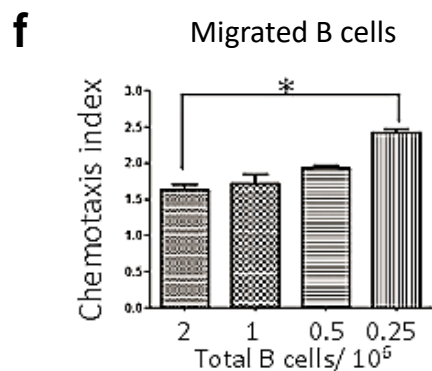

# Supplementary Figure 5

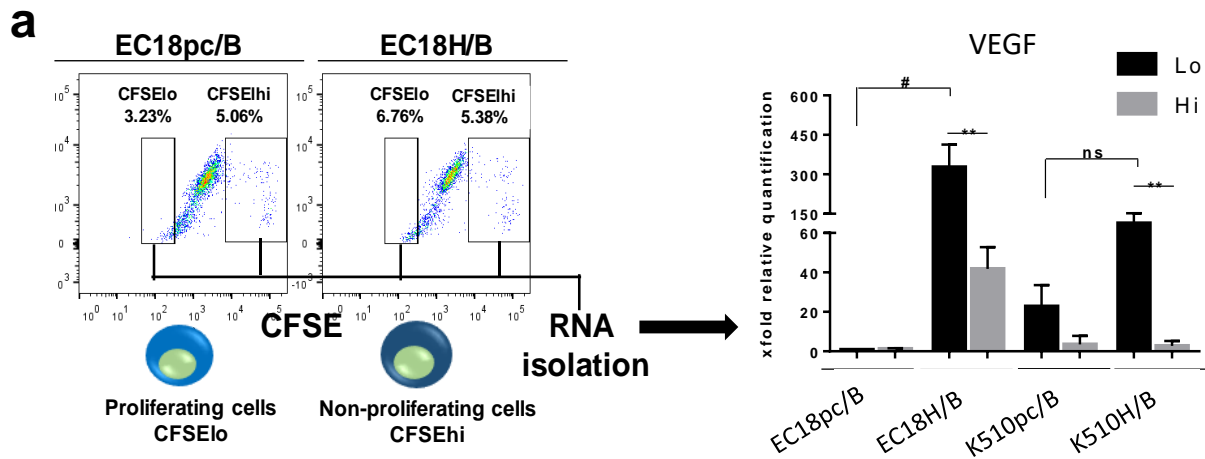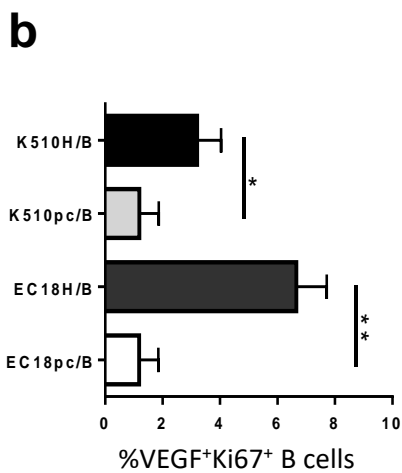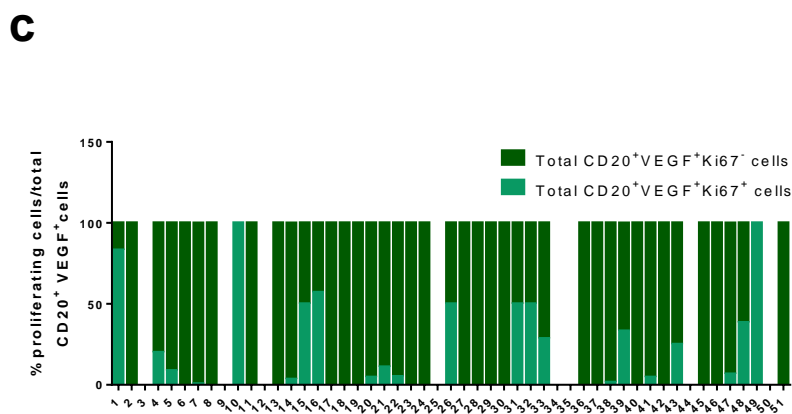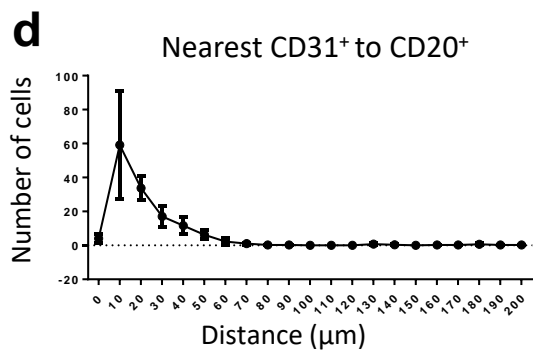

# Supplementary Figure 6

**a**

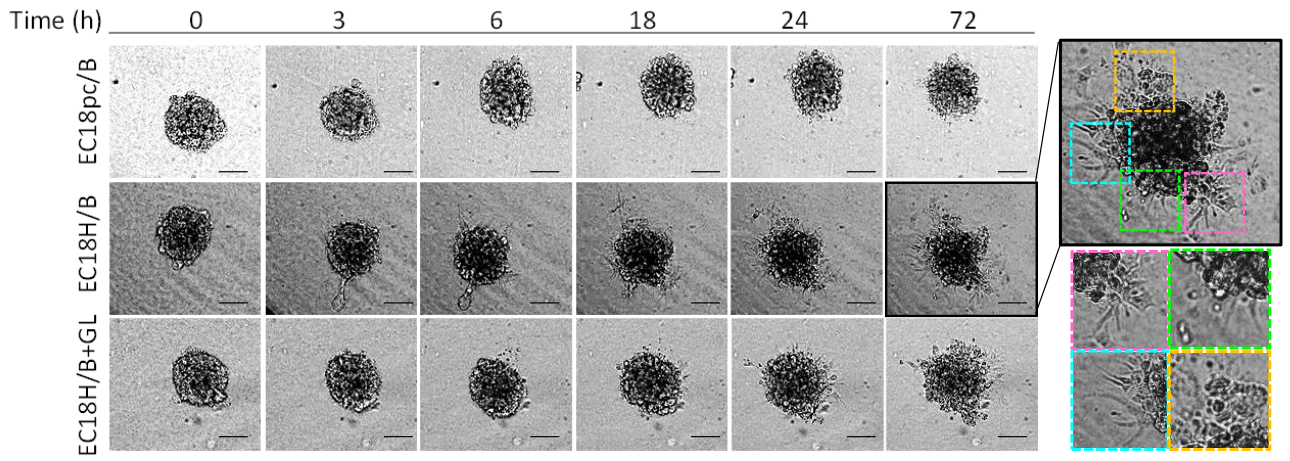

**b**

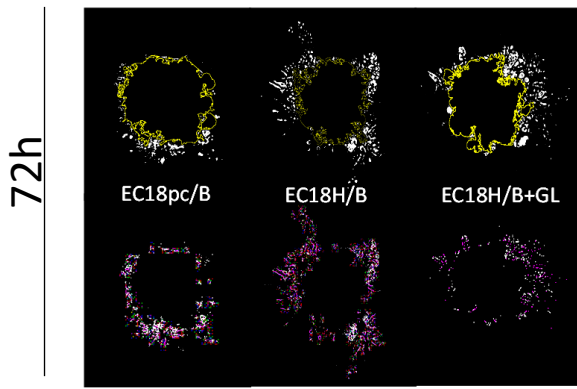

**c**

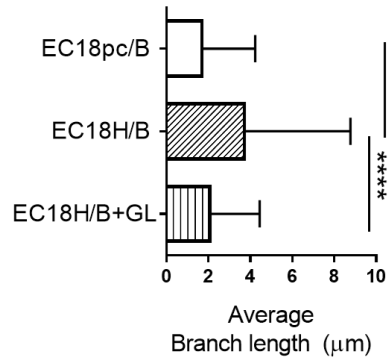

**d**

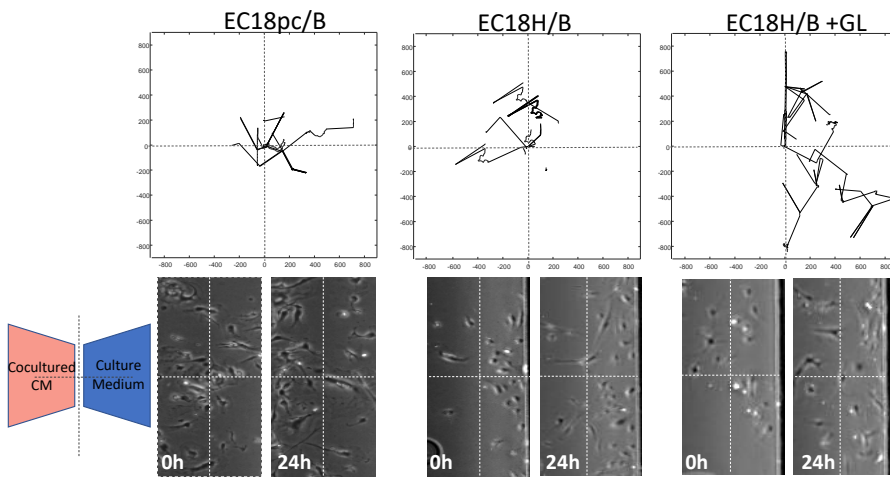

# Supplementary Figure 7

**a**

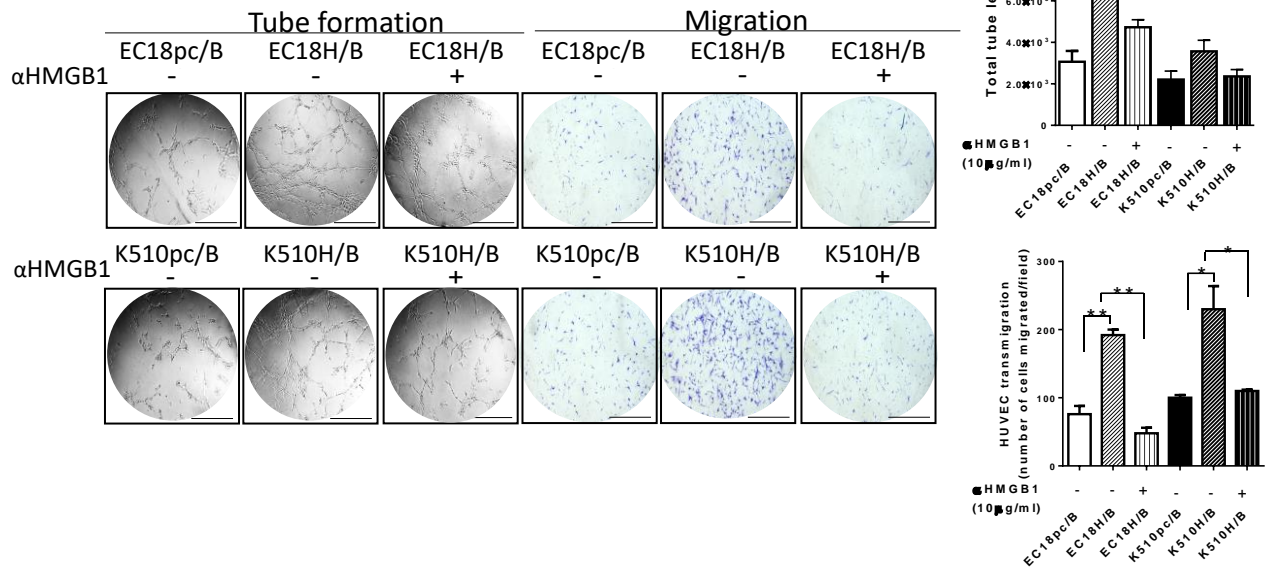

**b**

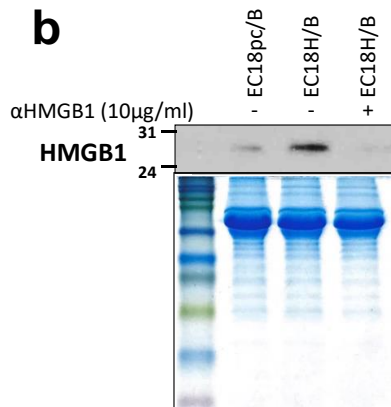

**c**

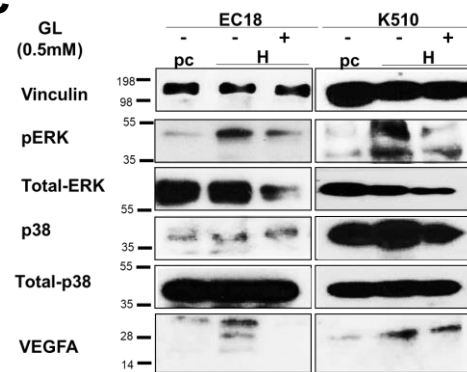

**d**

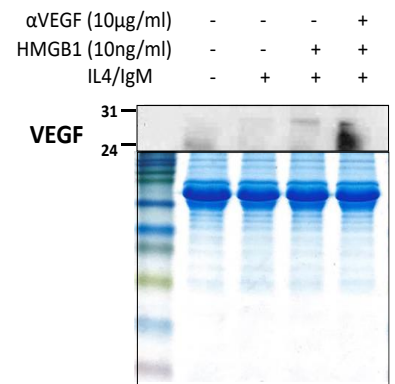

**e**

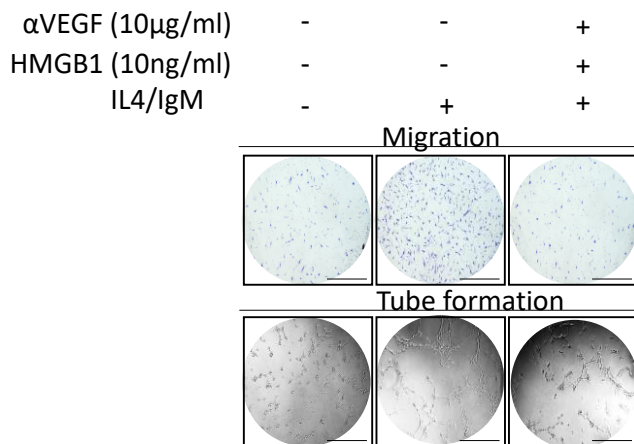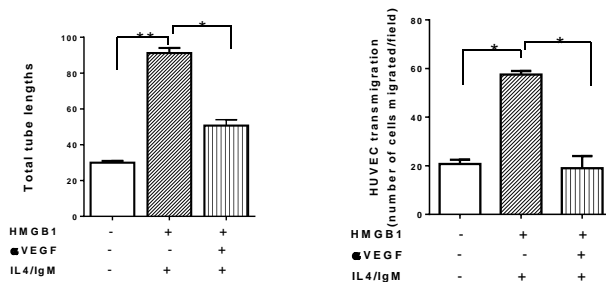

**f**

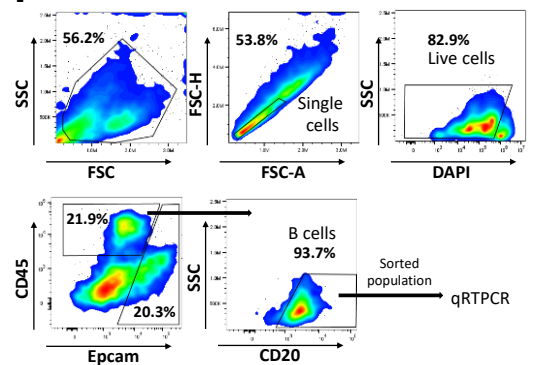

# Supplementary Figure 8

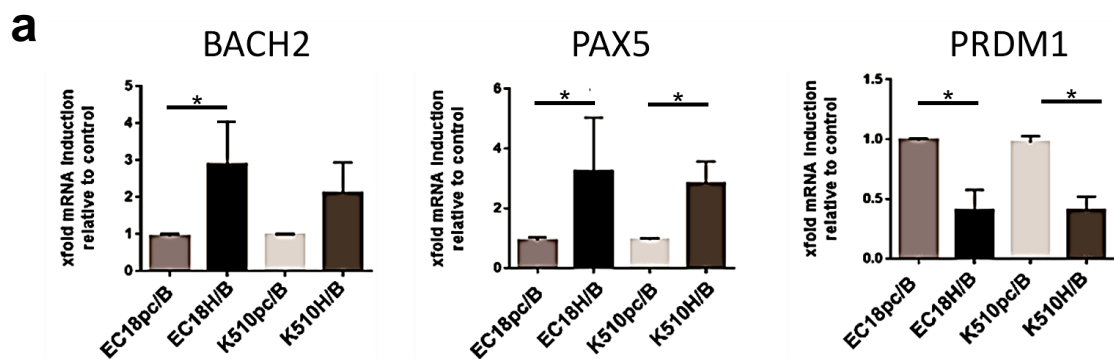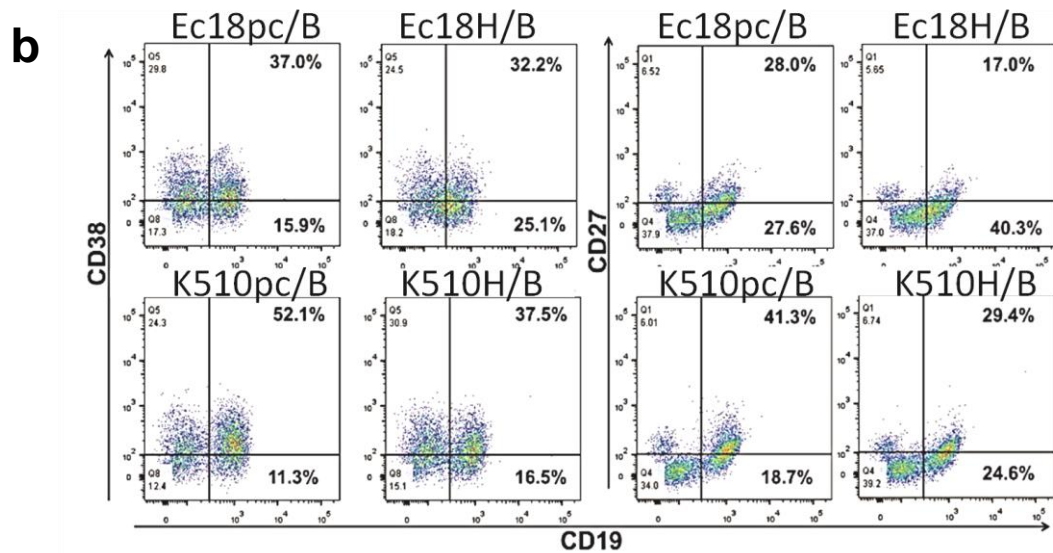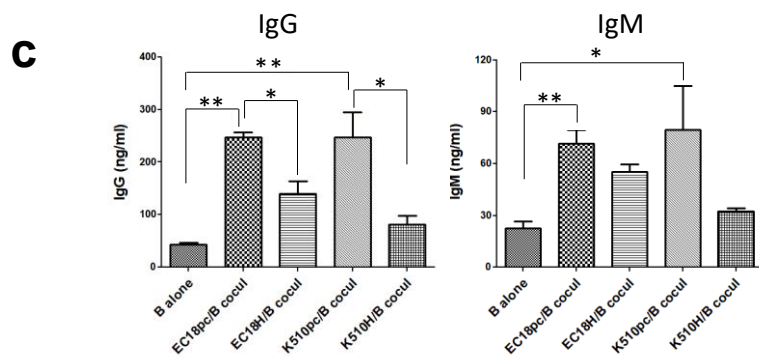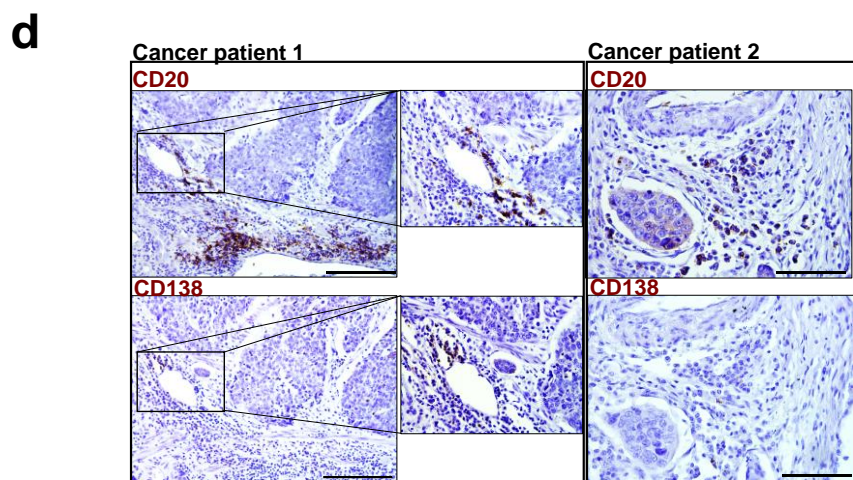

Supplement: 10456_2021_9819_MOESM2_ESM.pdf [file 10456_2021_9819_MOESM2_ESM.pdf]
