# Supplementary material
Source: PubMed Central journal article supplement (PMC9054905)
Supplement: 10456_2021_9819_MOESM1_ESM.pdf [file 10456_2021_9819_MOESM1_ESM.pdf]

# Supplementary Table 1

|                        | Total (n = 118) | HMGB1 expression        |                         | P value |
|------------------------|-----------------|-------------------------|-------------------------|---------|
|                        |                 | Low expression (n = 59) | High expression (n =59) |         |
| <b>Gender</b>          |                 |                         |                         | 0.708   |
| Male                   | 70              | 34                      | 36                      |         |
| Female                 | 48              | 25                      | 23                      |         |
| <b>Age</b>             |                 |                         |                         | 0.853   |
| <60                    | 67              | 34                      | 33                      |         |
| ≥60                    | 51              | 25                      | 26                      |         |
| <b>Differentiation</b> |                 |                         |                         | 0.067   |
| Well                   | 12              | 5                       | 7                       |         |
| Modest                 | 74              | 43                      | 31                      |         |
| Poor                   | 32              | 11                      | 21                      |         |
| <b>Stage</b>           |                 |                         |                         | 0.527   |
| 0                      | 1               | 1                       | 0                       |         |
| I                      | 3               | 1                       | 2                       |         |
| IIA                    | 77              | 41                      | 36                      |         |
| IIB                    | 12              | 4                       | 8                       |         |
| III                    | 24              | 11                      | 13                      |         |
| IVB                    | 1               | 1                       | 0                       |         |
| <b>T stage</b>         |                 |                         |                         | 0.587   |
| T0                     | 1               | 1                       | 0                       |         |
| T1                     | 3               | 1                       | 2                       |         |
| T2                     | 44              | 20                      | 24                      |         |
| T3                     | 69              | 36                      | 33                      |         |
| T4                     | 1               | 1                       | 0                       |         |
| <b>N stage</b>         |                 |                         |                         | 0.035   |
| Nx                     | 6               | 6                       | 0                       |         |
| N0                     | 75              | 37                      | 38                      |         |
| N1                     | 37              | 16                      | 21                      |         |

# Supplementary Table 2

|                        | Total (n = 125) | Subgroup 1<br>Both low (n = 27) | Subgroup 2<br>Low HMGB1/High CD20Ki67 (n = 34) | Subgroup 3<br>High HMGB1/Low CD20Ki67 (n = 33) | Subgroup 4<br>Both high (n = 31) | P value |
|------------------------|-----------------|---------------------------------|------------------------------------------------|------------------------------------------------|----------------------------------|---------|
| <b>Gender</b>          |                 |                                 |                                                |                                                |                                  | 0.656   |
| Male                   | 78              | 15                              | 22                                             | 23                                             | 18                               |         |
| Female                 | 47              | 12                              | 12                                             | 10                                             | 13                               |         |
| <b>Age</b>             |                 |                                 |                                                |                                                |                                  | 0.586   |
| <60                    | 64              | 11                              | 17                                             | 18                                             | 18                               |         |
| ≥60                    | 61              | 16                              | 17                                             | 15                                             | 13                               |         |
| <b>Differentiation</b> |                 |                                 |                                                |                                                |                                  | 0.093   |
| Well                   | 14              | 1                               | 2                                              | 4                                              | 7                                |         |
| Modest                 | 78              | 19                              | 19                                             | 24                                             | 16                               |         |
| Poor                   | 33              | 7                               | 13                                             | 5                                              | 8                                |         |
| <b>Stage</b>           |                 |                                 |                                                |                                                |                                  | 0.258   |
| 0                      | 1               | 1                               | 0                                              | 0                                              | 0                                |         |
| I                      | 3               | 1                               | 2                                              | 0                                              | 0                                |         |
| IIA                    | 63              | 11                              | 20                                             | 19                                             | 13                               |         |
| IIIB                   | 12              | 0                               | 4                                              | 3                                              | 5                                |         |
| III                    | 42              | 12                              | 6                                              | 11                                             | 13                               |         |
| IV/A                   | 2               | 1                               | 1                                              | 0                                              | 0                                |         |
| IV/B                   | 2               | 1                               | 1                                              | 0                                              | 0                                |         |
| <b>T stage</b>         |                 |                                 |                                                |                                                |                                  | 0.205   |
| T0                     | 1               | 1                               | 0                                              | 0                                              | 0                                |         |
| T1                     | 3               | 1                               | 2                                              | 0                                              | 0                                |         |
| T2                     | 38              | 5                               | 15                                             | 9                                              | 9                                |         |
| T3                     | 82              | 20                              | 16                                             | 24                                             | 22                               |         |
| T4                     | 1               | 0                               | 1                                              | 0                                              | 0                                |         |
| <b>N stage</b>         |                 |                                 |                                                |                                                |                                  | 0.055   |
| Nx                     | 5               | 1                               | 0                                              | 4                                              | 0                                |         |
| N0                     | 62              | 12                              | 22                                             | 15                                             | 13                               |         |
| N1                     | 58              | 14                              | 12                                             | 14                                             | 18                               |         |

# Supplementary Table 3

| qRT-PCR primer                                          |                                     |
|---------------------------------------------------------|-------------------------------------|
| HUMAN                                                   |                                     |
| VEGFA-F                                                 | 5'ATCTGCATGGTGATGTTGGA'3            |
| VEGFA-R                                                 | 5'GGGCAGAATCATCACGAAGT'3            |
| EDN1-F                                                  | 5'AGAGTGTGTCTACTTCTGCCA'3           |
| EDN1-R                                                  | 5'CTTCCAAGTCCATACGGAACAA'3          |
| VEGFR2-F                                                | 5'GTGATCGGAAATGACACTGGAG'3          |
| VEGFR2-R                                                | 5'CATGTTGGTCACTAACAGAAGCA'3         |
| CD31-F                                                  | 5'ACCGTGACGGAATCCTTCTCT'3           |
| CD31-R                                                  | 5'GCTGGACTCCACTTTGCAC'3             |
| PAX5-F                                                  | 5'ACTTGCTCATCAAGGTGTCAG'3           |
| PAX5-R                                                  | 5'TCCTCCAATTACCCAGGCTT'3            |
| IRF4-F                                                  | 5'GCTGATCGACCAGATCGACAG'3           |
| IRF4-R                                                  | 5'CGGTTGTAGTCCTGCTTGC'3             |
| BCL2-F                                                  | 5'GGTGGGGTGCATGTGTGTGG'3            |
| BCL-R                                                   | 5'CGGTTTCAGTACTCAGTCATCC'3          |
| BACH2-F                                                 | 5'GCACATTCGGGAAGATAACTC'3           |
| BACH2-R                                                 | 5'GGGCGGCTCACTTTTAATCTG'3           |
| IL8-F                                                   | 5'ACCGGAAGGAACCATCTCAC'3            |
| IL8-R                                                   | 5'AAACTGCACCTTCACACAGAG'3           |
| HMGB1-F                                                 | 5'GCGGACAAGGCCCGTTA'3               |
| HMGB1-R                                                 | 5'AGAGGAAGAAGGCCGAAGGAA'3           |
| beta-actin-F                                            | 5'AGCACAGAGCCTCGCCTTT'3             |
| beta-actin-R                                            | 5'ATCATCATCCATGGTGAGCTGG'3          |
| CXCR5-F                                                 | 5'CACGTTGCACCTTCTCCAA'3             |
| CXCR5-R                                                 | 5'GGAATCCC GCCACATGGTAG'3           |
| CCR7-F                                                  | 5'GATACCTACCTGCTCAACCTG'3           |
| CCR7-R                                                  | 5'AAGTGGACACCGAAGACCC'3             |
| MICE                                                    |                                     |
| vegfr1-F                                                | 5'TGGACCCAGATGAAGTTCCC'3            |
| vegfr1-R                                                | 5'GCGATTTGCCTAGTTTCAGTCT'3          |
| vegfr2-F                                                | 5'AGCACTGGTCCTATGGGTTG'3            |
| vegfr2-R                                                | 5'GGTTCTGCCATTTGATCCA'3             |
| fgfr1-F                                                 | 5'ATACGTGTTGGCGGGTAACTC'3           |
| fgfr2-R                                                 | 5'TGGAGTGGTCATCGCCACCTTAAT'3        |
| gapdh-1                                                 | 5'AGGTCGGTGTGAACGGATTTG'3           |
| gapdh-2                                                 | 5'TGTAGACCATGTAGTTGAGGTCA'3         |
| Transfection and cloning of HMGB1 expression constructs |                                     |
| HMGB1-CLO-F-NheI                                        | 5'CGGCTAGC TTCGGTGCACGAAAATAACTAA'3 |
| HMGB1-CLO-R-XhoI                                        | 5'CGCTCGAG AGTGAGTTGTGTACAGGGGG'3   |
